# Supplementary material
Source: publisher figshare collection journal article supplement (https://gsapubs.figshare.com/ndownloader/files/23303714)
Supplement: Supplementary file 1 [file 23303714]

**Zinc isotope evidence for intensive magmatism  
immediately before the end-Permian mass extinction**

**Sheng-Ao Liu<sup>\*</sup>, Huaichun Wu<sup>\*</sup>, Shu-zhong Shen, Ganqing Jiang, Shihong Zhang,**

**Yiwen Lv, Hua Zhang, and Shuguang Li**

**\*E-mails:** lsa@cugb.edu.cn; whcgeo@cugb.edu.cn

**This file includes:**

**1. SAMPLING SECTION**

**2. ANALYTICAL METHODS**

**3. Figures DR1-4**

**4. Tables DR1-5**

**5. References**

## 1. SAMPLING SECTION

The Meishan section (31°4'55" N, 119°42'22.9" E) is the most intensively studied Permian/Triassic boundary (PTB) section and is located in Changxing County, Zhejiang Province, South China. Paleogeographically, it was located near the tropics during the Late Permian and Early Triassic (Yin et al., 2001; Jin et al., 2006) (Fig. 1). The Meishan section is the stratotype section for the Changhsingian Stage, the Global Stratotype Section and Point (GSSP) for the PTB, and the Wuchiapingian-Changhsingian boundary (WCB) (Yin et al., 2001; Jin et al., 2006).

Core M1 was drilled 500 m west of the Meishan section D. Recovered Upper Permian-Lower Triassic strata correlate bed-by-bed with the lithostratigraphic units at the outcrops. The rocks of this drill core were considered to be free from outcrop contamination, and may afford the best possible geochemical record for the environmental evolution (Cao et al., 2009). Sixty-five bulk samples of micritic limestone and argillaceous limestone were collected over a 20-m-thick interval (Beds 19-37) across the PTB from Core M1 for carbon and zinc isotope analysis (Fig. 2, Tables DR1 and DR2). Beds 19-24 of the Changhsing Formation (Upper Permian) are composed of bioclastic and micritic limestone with thinly interbedded chert layers. Beds 25–37 of the Yinkeng Formation (uppermost Permian to lowermost Triassic) consist of parallel-laminated calcareous mudstone and thin-bedded argillaceous limestone. These rocks were deposited in middle-upper slope environments (Yin et al., 2001; Jin et al., 2006).

Conodont biostratigraphy has been intensively studied at the Meishan section (Yin et al., 2001; Jin et al., 2006; Jiang et al., 2007; Zhang et al., 2009; Yuan et al., 2014). The conodont zones in the studied interval (Beds 19-37), in ascending order, include *C. changxingensis* Zone (Beds 19-22), *C. yini* Zone (Beds 22-24d), *C. meishanensis* Zone (Beds 24e-25), *H. praeparvus*-*H. changxingensis* Zone (Beds 26-27b), *H. parvus* Zone

(Bed 27c), *I. staeschei* Zone (Beds 27d-28), *I. isarcica* Zone (Bed 29), and *C. planata* Zone (Beds 30–37). The GSSP for the PTB was defined at the first appearance datum (FAD) of *H. parvus* (Yin et al., 2001). The mass extinction interval was identified between the top of Bed 24e and Bed 28.

Recently, Burgess et al. (2014) re-dated the zircons from five volcanic ash beds of the Meishan section using high-precision U–Pb ID-TIMS method, and the new ages are  $251.495 \pm 0.064$  Ma (Bed 34),  $251.583 \pm 0.086$  Ma (Bed 33),  $251.880 \pm 0.031$  Ma (Bed 28),  $251.941 \pm 0.037$  Ma (Bed 25) and  $252.104 \pm 0.089$  Ma (Bed 22) (Fig. 2). These ages are consistent with previously published ages (Shen et al., 2011) and the astrochronology (Wu et al., 2013) within error. The ages and durations of the Zn isotope stages (S1–S4 in Fig. 2) were determined by the U-Pb ages (Burgess et al., 2014) and astronomical time scale (Wu et al., 2013).

## 2. ANALYTICAL METHODS

### 2.1. Carbon and oxygen isotope analyses of carbonates

Bulk carbonate samples were powdered to react with purified  $\text{H}_3\text{PO}_4$  under vacuum at 50 °C for 12 h. Generated  $\text{CO}_2$  gas was cryogenically extracted and sealed in vacuumed tubes for isotope analysis. Isotope analyses were carried out at the Nanjing Institute of Geology and Palaeontology, Chinese Academy of Sciences using a Finnigan MAT-253 isotope-ratio mass spectrometer. Reproducibility on replicated samples is better than 0.03 ‰ (2s) for  $\delta^{13}\text{C}_{\text{carb}}$ , and 0.08 ‰ (2s) for  $\delta^{18}\text{O}$ . Peedee Belemnite (PDB) calibration was made through an internal laboratory standard GBW04405 with  $\delta^{13}\text{C}_{\text{carb}} = 0.57$  ‰ and  $\delta^{18}\text{O} = -8.49$  ‰. The  $\delta^{13}\text{C}_{\text{carb}}$  profile obtained in this study is consistent with that of Shen et al. (2011) and Cao et al. (2009) (Fig. 2; Tables DR1-2).

### 2.2. Carbonate dissolution procedure for Zn isotopes and concentrations

A leaching procedure modified from previously established methods (Pichat et al.,

2003; Kunzmann et al., 2013) was designed to extract the carbonate fraction of samples. This chemical procedure allows the separation of the carbonate fraction from other components without inducing Zn isotope fractionation (Pichat et al., 2003). Samples were carefully checked to avoid visible veins and fractures. Sample powders of 200 mesh were obtained using an agate mortar that is carefully cleaned with ethanol and Milli-Q water (18.2 MΩ). The resulting powders were then thoroughly homogenized. The whole procedure avoids Zn contamination by metal tools. The leaching steps were performed in a clean room under laminar flow hood (class 100) to minimize Zn contamination. All reagents have been detected to ensure no potential Zn contamination. The supplies used in the leaching experiments were cleaned thoroughly between each sample. Teflon perfluoroalkoxy (PFA) beakers were used for leaching solution, which were pre-cleaned with 1:1 (v/v) nitric acid and hydrochloric acid. Polypropylene filters and centrifuge tubes were soaked in 10% nitric acid over 24 hours without heating. Hydrosoluble salts and exchangeable fraction on clays were removed before leaching of carbonates using Milli-Q water and 1 N ammonium acetate (NH<sub>4</sub>AC) alternately.

The carbonate fraction was then leached with two steps of 0.05 M super-pure acetic acid in a thermostat at 65 °C, until no bubbles were generated. The supernatants were collected after 20 min of centrifugation, followed by filtration. The leached supernatants were dried at 80 °C and added with 2 ml of 8 M HCl. This step was repeated twice to remove acetic acid. Finally, the solution was prepared in 1 ml of 8 M HCl for chemical anion-exchange separation. During the preparation, blanks (including reagents and containers) are added to mimic the leaching procedure. The leaching procedure ensures the separation of the carbonate fraction of samples without contamination from other components (such as clays, salts, and oxides). This is consistent with the extremely high (>10,000) molar Ca/Al ratio of leached solution and <0.1‰ difference in δ<sup>66</sup>Zn of duplicate analysis. Most samples were also leached following previously established

method (Pichat et al., 2003; Kunzmann et al., 2013) using 1.5 M acetic acid and no significant differences were found. However, the weaker acetic acid (0.05 M) used in this study faithfully reduce the risk of release of Zn from other components such as clays and oxides. In particular, the two steps of leaching on the same samples could help to assess whether a single component (carbonate) was leached and no other components were significantly involved. This is achieved by analyzing Zn isotope compositions of the two leachates from the same samples.

### 2.3. Zinc isotope measurements

The column chemistry and instrumental analysis of Zn isotopes follow the methods of Liu et al. (2014) and Maréchal et al. (1999). The leaching solutions were dried at 80 °C. For some samples, the leaching residues were completely dissolved in a 1:1 (v/v) mixture of double-distilled HF and HNO<sub>3</sub> in Savillex screw-top beakers. Zinc was purified by an ion-exchange chromatography using Bio-Rad strong anion resin AG-MP-1M. 2 ml pre-cleaned resin was loaded onto the column. Matrix elements were eluted in the first 10 ml 8 N HCl. Copper and iron were then collected in the following 24 ml of 8 N HCl + 0.001% H<sub>2</sub>O<sub>2</sub> and 18 ml of 2N HCl. Zinc was collected in the subsequent 15 ml of 0.5N HNO<sub>3</sub>. This procedure allows Ca to be completely separated from Zn and a 100% recovery for Zn. The total Zn of procedural blanks is 2 ng, which is less than 0.5% of loaded Zn (>0.4 µg) in the studied samples. The Zn fractions were repeatedly dried and dissolved with 3% HNO<sub>3</sub> to remove all chlorine prior to isotope analysis.

Zinc isotopic ratios were measured using a *Neptune plus* multi-collector inductively coupled plasma mass-spectrometry (MC-ICP-MS) at the Isotope Geochemistry Laboratory of the China University of Geosciences (Beijing). Sample-standard bracketing method was used to correct for instrumental mass fractionation. The samples and standards are run in ~200 ppb diluted solution dissolved in 3% (v) HNO<sub>3</sub>. The take-up

time is 80 s. The high-sensitivity (X) cones made of Ni are used for the increase of transmission to ensure that the  $^{64}\text{Zn}$  signals are usually at the level of  $\sim 1.5$  V/100 ppb. Zinc isotopic data are reported in standard  $\delta$ -notation in per mil relative to standard reference material JMC 3-0749L by Maréchal et al. (1999), the Johnson Matthey (JMC) Zn standard solution from the Lyon-CNRS laboratory. The long-term external reproducibility for  $\delta^{66}\text{Zn}$  measurements of synthetic pure Zn solutions is better than  $\pm 0.03\text{‰}$  (2SD) (Fig. DR3), and for natural rock samples the reproducibility is better than  $\pm 0.06\text{‰}$  (2SD) based on whole procedure repeat of the standard materials (Lv et al., 2016). The error of reported  $\delta^{66}\text{Zn}$  values represents replicate measurements of the same samples, which is always used while greater than the long-term reproducibility of  $\pm 0.06\text{‰}$ . The Zn isotope data for leaching solutions and residues are reported in Table DR2. Zn isotope data of the leachates are the mean of the two steps of leaching on the sample samples, which agree with each other within  $\pm 0.1\text{‰}$ . International rock standards (BHVO-2, BIR-1a) were analyzed during the course of this study, yielding  $\delta^{66}\text{Zn}$  values of  $0.32 \pm 0.04\text{‰}$  and  $0.28 \pm 0.04\text{‰}$  respectively (Table DR3), which agree with those reported by previous studies ( $0.28 \pm 0.12\text{‰}$  and  $0.26 \pm 0.11\text{‰}$ , respectively; e.g., Moeller et al., 2012). All samples analyzed in this study yield a slope of 1.996 in a  $\delta^{68}\text{Zn}$ – $\delta^{66}\text{Zn}$  cross-plot, which is consistent with the mass-dependent line with a slope of 2, indicating mass-dependent Zn isotope fractionation and no analytical artifacts from unresolved isobaric interferences on Zn isotopes.

#### 2.4. Major and trace element analysis of bulk rocks and leaching solutions

The carbonate fractions were extracted for Zn concentration analysis following the same procedure for Zn isotope measurement (Table DR4). Trace element analyses of the leached solutions were accomplished using an inductively coupled plasma mass spectrometer (ICP-MS) similar to previously reported procedures (Liu et al., 2010). Reproducibility was better than 5% for elements with concentrations  $>10$  ppm and less

than 10% for those <10 ppm based on long-term analysis of standard materials. The basalt standard (BHVO-2) and carbonatite standard (COQ-1) analyzed yield Zn concentrations of 107 µg/g and 85 µg/g, respectively, consistent within errors with the recommended values (103 µg/g and 87 µg/g). The Zn concentration in carbonates is calculated from Zn contents (µg) in the leaching solutions divided by the contents of carbonates (g), the latter of which are calculated based on major elements in the bulk rocks.

Some samples of bulk sediments were selected for major element analysis to evaluate the possible influence of silicate components on Zn isotopic compositions of the leached carbonate fractions (Tables DR5). Major elements were analyzed using the wet-chemistry methods at the China University of Geosciences (Beijing). Losses of ignition (LOI) were determined by gravimetric methods. Analytical reproducibility of major elements is better than 2% and for the majority is better than 1%.

## 2.5. Mass balance calculation on Zn cycling in the end-Permian ocean

The global oceanic mass balance of Zn isotopes was recently evaluated (Little et al., 2014; Vance et al., 2016). The main inputs of Zn to the modern ocean include rivers, hydrothermal fluids and aeolian dust and the outputs include Fe-Mn oxides and carbonates as well as euxinic sediments. Assuming steady state (within the ca. 50 k.y. residence time of Zn) (Little et al., 2014) and the possible external sources (e.g., increased weathering, volcanism or hydrothermal input), the isotope mass balance gives the following equation:

$$\delta^{66}\text{Zn}_{\text{target}} \times \text{Zn}_{\text{target}} = \delta^{66}\text{Zn}_{\text{initial}} \times \text{Zn}_{\text{initial}} + \delta^{66}\text{Zn}_{\text{addition}} \times \text{Zn}_{\text{addition}} \quad (1)$$

Where:

$\delta^{66}\text{Zn}_{\text{target}}$  and  $\text{Zn}_{\text{target}}$  are the Zn isotope value and oceanic Zn inventory at the negative  $\delta^{66}\text{Zn}$  excursion (Stage S2; Fig. 2). We use the measured  $\delta^{66}\text{Zn}$  of the Meishan

section to approximate the oceanic  $\delta^{66}\text{Zn}$  ( $\delta^{66}\text{Zn}_{\text{target}} \approx 0.34\text{‰}$ ), and  $\text{Zn}_{\text{target}} = \text{Zn}_{\text{initial}} + \text{Zn}_{\text{addition}}$ .

$\delta^{66}\text{Zn}_{\text{initial}}$  and  $\text{Zn}_{\text{initial}}$  are the oceanic  $\delta^{66}\text{Zn}$  and oceanic Zn inventory before the negative  $\delta^{66}\text{Zn}$  shift (Stage S1 in **Fig. 2**). Because the  $\delta^{66}\text{Zn}$  values ( $\sim 0.83\text{‰}$ ) before the negative shift in Meishan section is similar to that of the modern carbonates ( $\delta^{66}\text{Zn} \approx 0.9\text{‰}$ ; [Little et al., 2014](#)), we assume that the average global ocean Zn inventory and isotope values before the negative  $\delta^{66}\text{Zn}$  shift were also similar to those of the modern ocean ( $\text{Zn}_{\text{initial}} \approx 7.3 \times 10^{12} \text{ mol}$ ,  $\delta^{66}\text{Zn}_{\text{initial}} \approx 0.51\text{‰}$ ; [Little et al., 2014](#)).

$\delta^{66}\text{Zn}_{\text{addition}}$  and  $\text{Zn}_{\text{addition}}$  are the Zn isotope value and mass of external input (i.e., weathering or riverine input, direct volcanic or hydrothermal input into the ocean).

Assuming that the negative  $\delta^{66}\text{Zn}$  shift was caused by  $\text{CO}_2$ -driven weathering input that has a  $\delta^{66}\text{Zn}_{\text{addition}} \approx 0.33\text{‰}$  ([Little et al., 2014](#)), our calculation indicates that:

$$\begin{aligned} \text{Zn}_{\text{addition}} &= [(\delta^{66}\text{Zn}_{\text{target}} \times \text{Zn}_{\text{initial}}) - (\delta^{66}\text{Zn}_{\text{initial}} \times \text{Zn}_{\text{initial}})] / (\delta^{66}\text{Zn}_{\text{addition}} - \delta^{66}\text{Zn}_{\text{target}}) \quad (2) \\ &= [0.34 \times (7.3 \times 10^{12}) - 0.51 \times (7.3 \times 10^{12})] / (0.33 - 0.34) \\ &= 1.24 \times 10^{14} \text{ mol} \end{aligned}$$

With the modern riverine input of  $5.9 \times 10^8 \text{ mol/yr}$ , even if the weathering input was 10 times of the modern riverine input, the amount of time needed to lower the  $\delta^{66}\text{Zn}$  down to crustal value, as recorded in the Meishan section, would take 20,000 years. The abrupt  $\delta^{66}\text{Zn}$  shift in Meishan happened at a  $\leq 3 \text{ cm}$  interval that has been constrained as  $< 1,500$  years ([Wu et al., 2013](#); [Burgess et al., 2014](#)). In such a time framework, weathering input alone may not be able to shift  $\delta^{66}\text{Zn}$  down to the crustal value. A more  $^{66}\text{Zn}$ -depleted source is needed. Isotopically light Zn sources from volcanic ashes, hydrothermal fluids and/or extremely fast weathering of fresh large igneous provinces (LIPs) are needed.



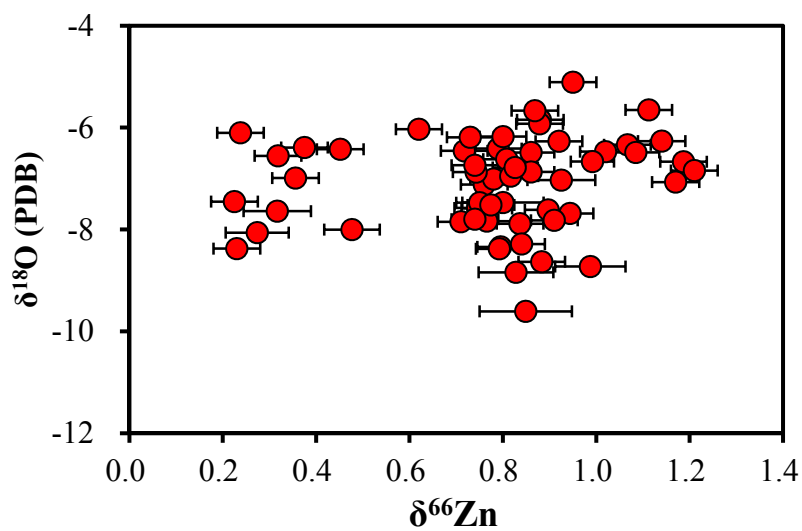

**Figure DR1.** Cross plot of  $\delta^{66}\text{Zn}$ – $\delta^{18}\text{O}$  of carbonates showing the absence of covariation. The lack of  $\delta^{66}\text{Zn}$ – $\delta^{18}\text{O}$  and  $\delta^{66}\text{Zn}$ –Sr/Ca (Fig. 3 in main text) covariance indicates that the Zn isotope shift is not related to precipitation rate or diagenesis.

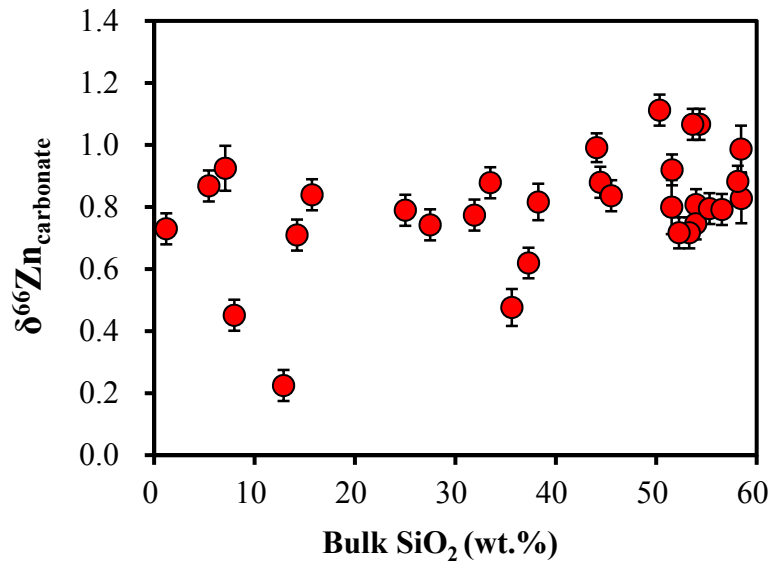

**Figure DR2.** Cross plot of  $\delta^{66}\text{Zn}$  vs.  $\text{SiO}_2$  of bulk-sediments from the Meishan section. The absence of correlation suggests that the temporal  $\delta^{66}\text{Zn}$  variations are not caused by adsorption of Zn onto silicate or clay phases.

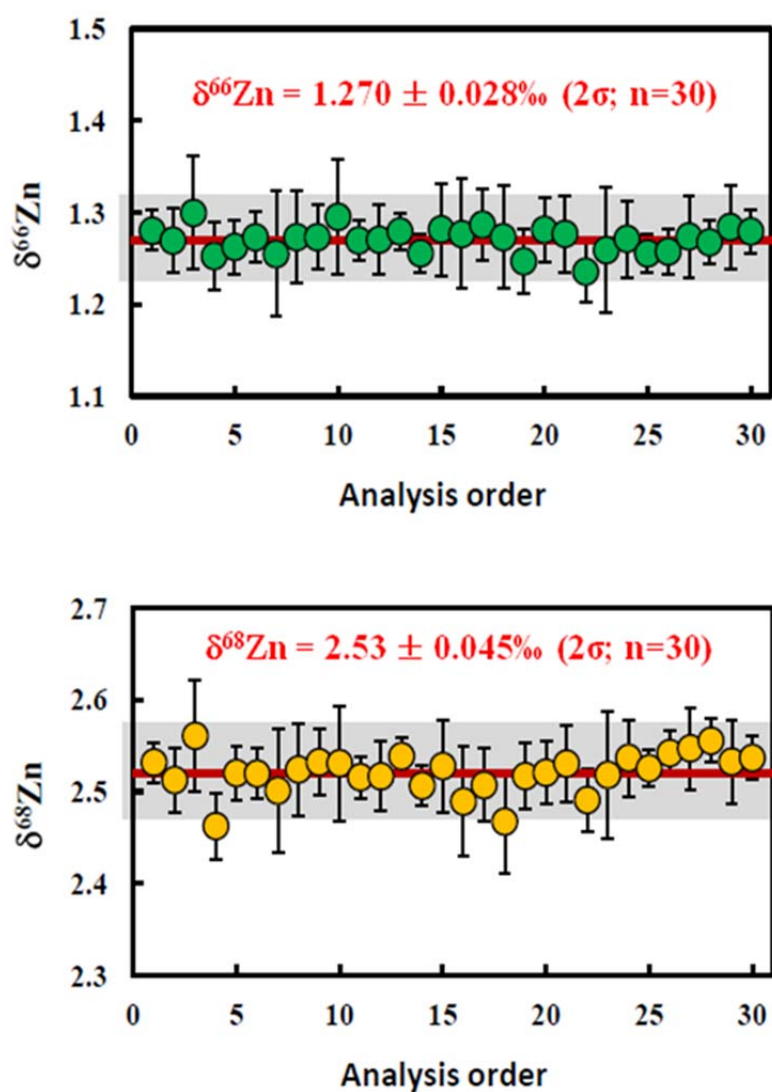

**Figure DR3.** Long-term analysis of in-house zinc standard solutions with reproducibility of  $\pm 0.028\text{‰}$  (2SD) for  $\delta^{66}\text{Zn}$  measurements.

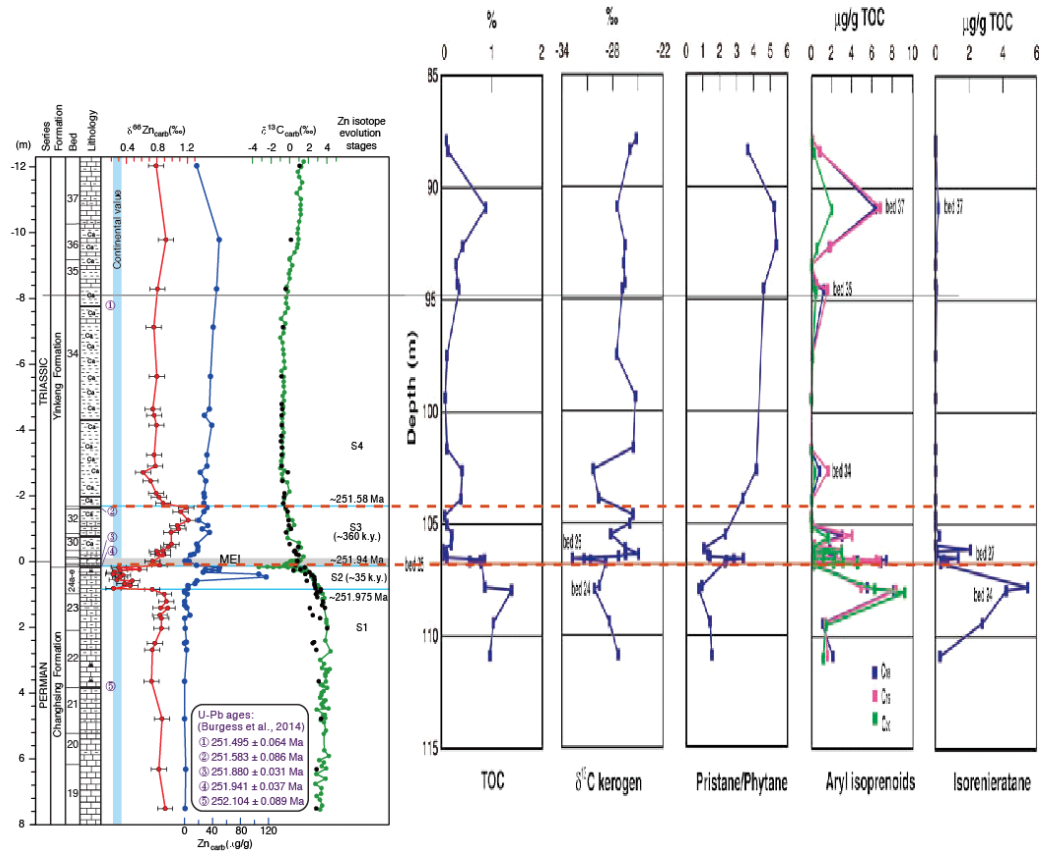

**Figure DR4.** Comparison between Zn isotope data in this study and organic geochemical, biomarker, and bulk carbon isotopic data from Grice et al. (2005).

**Table DR1.** Carbonate carbon and oxygen isotope data across the PTB from Meishan, South China.

| Depth to<br>PTB (m) | Lithology              | $\delta^{13}\text{C}_{\text{PDB}}$<br>(‰) | $\delta^{18}\text{O}$<br>(‰) | Depth to PTB<br>(m) | $\delta^{13}\text{C}_{\text{PDB}}$<br>(‰) |
|---------------------|------------------------|-------------------------------------------|------------------------------|---------------------|-------------------------------------------|
| This Study          |                        |                                           |                              | Shen et al. (2011)  |                                           |
| -12.03              | Argillaceous limestone | 1.06                                      | -6.41                        | -12.16              | 1.51                                      |
| -9.78               | Micritic limestone     | 0.14                                      | -6.27                        | -12.00              | 1.23                                      |
| -8.29               | Argillaceous limestone | -0.43                                     | -6.62                        | -11.85              | 0.88                                      |
| -7.13               | Argillaceous limestone | -0.72                                     | -7.12                        | -11.69              | 1.03                                      |
| -5.63               | Argillaceous limestone | -0.88                                     | -7.47                        | -11.53              | 1.34                                      |
| -4.79               | Argillaceous limestone | -0.87                                     | -7.78                        | -11.35              | 1.12                                      |
| -4.63               | Argillaceous limestone | -0.80                                     | -7.58                        | -11.20              | 0.76                                      |
| -4.45               | Argillaceous limestone | -0.87                                     | -7.59                        | -11.02              | 1.21                                      |
| -4.14               | Argillaceous limestone | -0.85                                     | -8.34                        | -10.84              | 1.18                                      |
| -3.82               | Argillaceous limestone | -0.89                                     | -6.27                        | -10.70              | 1.16                                      |
| -3.66               | Argillaceous limestone | -0.94                                     | -7.07                        | -10.55              | 1.19                                      |
| -3.47               | Argillaceous limestone | -0.83                                     | -6.47                        | -10.34              | 1.03                                      |
| -3.24               | Argillaceous limestone | -0.86                                     | -7.84                        | -10.12              | 0.91                                      |
| -2.90               | Argillaceous limestone | -0.86                                     | -7.01                        | -9.98               | 0.85                                      |
| -2.71               | Argillaceous limestone | -0.19                                     | -6.03                        | -9.80               | 0.96                                      |
| -2.45               | Argillaceous limestone | -0.79                                     | -6.46                        | -9.65               | 0.88                                      |
| -2.07               | Argillaceous limestone | -0.56                                     | -8.38                        | -9.54               | 0.79                                      |
| -1.96               | Argillaceous limestone | -0.60                                     | -8.84                        | -9.40               | 0.54                                      |
| -1.77               | Argillaceous limestone | -0.68                                     | -8.63                        | -9.22               | 0.04                                      |
| -1.64               | Argillaceous limestone | -0.42                                     | -6.67                        | -9.18               | -0.02                                     |
| -1.52               | Argillaceous limestone | -0.23                                     | -5.65                        | -9.00               | 0.28                                      |
| -1.25               | Argillaceous limestone | -0.13                                     | -6.84                        | -8.86               | 0.06                                      |
| -1.10               | Argillaceous limestone | -0.08                                     | -6.34                        | -8.75               | -0.08                                     |
| -0.99               | Argillaceous limestone | 0.15                                      | -6.49                        | -8.61               | 0.00                                      |
| -0.89               | Argillaceous limestone | -0.39                                     | -8.73                        | -8.36               | -0.32                                     |
| -0.53               | Argillaceous limestone | 0.00                                      | -6.67                        | -8.21               | -0.18                                     |
| -0.45               | Argillaceous limestone | 0.92                                      | -5.11                        | -8.03               | -0.37                                     |
| -0.33               | Argillaceous limestone | 0.57                                      | -5.85                        | -7.85               | -0.38                                     |
| -0.31               | Argillaceous limestone | 0.49                                      | -6.18                        | -7.71               | -0.19                                     |
| -0.23               | Argillaceous limestone | 0.72                                      | -6.95                        | -7.56               | -0.47                                     |
| -0.20               | Argillaceous limestone | 0.96                                      | -5.92                        | -7.38               | -0.93                                     |
| -0.02               | Dolomitic limestone    | 0.81                                      | -6.17                        | -7.24               | -0.46                                     |
| -0.01               | Dolomitic limestone    | 0.84                                      | -6.87                        | -7.09               | -0.63                                     |

|      |                        |      |       |       |       |
|------|------------------------|------|-------|-------|-------|
| 0.12 | Argillaceous limestone | 0.64 | -7.89 | -6.95 | -0.66 |
| 0.18 | Micritic limestone     | 1.62 | -7.47 | -6.81 | -1.00 |
| 0.24 | Micritic limestone     | 1.16 | -7.85 | -6.66 | -0.77 |
| 0.27 | Micritic limestone     | 1.82 | -6.55 | -6.44 | -0.70 |
| 0.33 | Micritic limestone     | 2.13 | -6.10 | -6.30 | -0.64 |
| 0.38 | Micritic limestone     | 1.68 | -7.45 | -6.08 | -0.60 |
| 0.41 | Micritic limestone     | 2.37 | -6.99 | -5.88 | -0.53 |
| 0.47 | Micritic limestone     | 2.63 | -7.64 | -5.80 | -0.88 |
| 0.56 | Micritic limestone     | 2.68 | -8.06 | -5.62 | -0.64 |
| 0.59 | Micritic limestone     | 1.84 | -8.00 | -5.47 | -0.65 |
| 0.67 | Micritic limestone     | 2.64 | -6.39 | -5.33 | -0.65 |
| 0.73 | Micritic limestone     | 2.70 | -6.42 | -5.15 | -0.56 |
| 0.82 | Micritic limestone     | 2.78 | -8.37 | -5.04 | -0.74 |
| 0.85 | Micritic limestone     | 3.35 | -6.74 | -4.89 | -0.62 |
| 0.90 | Micritic limestone     | 3.29 | -7.71 | -4.71 | -0.69 |
| 0.93 | Micritic limestone     | 2.94 | -6.98 | -4.68 | -0.71 |
| 0.99 | Micritic limestone     | 2.83 | -7.61 | -4.50 | -0.66 |
| 1.08 | Micritic limestone     | 2.97 | -9.16 | -4.35 | -0.81 |
| 1.22 | Micritic limestone     | 3.58 | -7.03 | -4.21 | -0.79 |
| 1.33 | Micritic limestone     | 3.49 | -8.28 | -4.07 | -0.76 |
| 1.41 | Micritic limestone     | 3.79 | -9.61 | -3.92 | -0.64 |
| 1.42 | Micritic limestone     | 2.17 | -7.68 | -3.78 | -0.75 |
| 1.63 | Micritic limestone     | 2.48 | -8.28 | -3.63 | -0.81 |
| 1.73 | Micritic limestone     | 3.27 | -6.49 | -3.45 | -0.77 |
| 2.03 | Micritic limestone     | 4.03 | -6.87 | -3.27 | -0.72 |
| 2.45 | Micritic limestone     | 2.63 | -7.29 | -3.18 | -0.76 |
| 2.48 | Micritic limestone     | 2.48 | -7.52 | -3.06 | -0.91 |
| 2.69 | Micritic limestone     | 2.87 | -7.80 | -2.95 | -0.88 |
| 3.64 | Micritic limestone     | 3.12 | -6.19 | -2.84 | -1.00 |
| 4.78 | Micritic limestone     | 3.37 | -5.67 | -2.77 | -0.56 |
| 6.32 | Micritic limestone     | 2.90 | -6.78 | -2.66 | -0.83 |
| 7.51 | Micritic limestone     | 2.86 | -7.82 | -2.52 | -0.78 |

**Table DR2.** Zinc isotopic ratios of leached carbonate fraction of samples from the Meishan section, South China

| Bed no. | Depth to PTB (m) | Lithology              | $\delta^{66}\text{Zn}$ (‰) | 2sd  | $\delta^{68}\text{Zn}$ (‰) | 2sd  | $\delta^{68}\text{Zn}/\delta^{66}\text{Zn}$ |
|---------|------------------|------------------------|----------------------------|------|----------------------------|------|---------------------------------------------|
| 37      | -12.03           | Argillaceous limestone | 0.79                       | 0.05 | 1.60                       | 0.07 | 2.03                                        |
| 36      | -9.78            | Micritic limestone     | 0.92                       | 0.05 | 1.85                       | 0.06 | 2.01                                        |
| 35      | -8.29            | Argillaceous limestone | 0.81                       | 0.05 | 1.61                       | 0.05 | 1.99                                        |
| 34      | -7.13            | Argillaceous limestone | 0.76                       | 0.05 | 1.53                       | 0.09 | 2.01                                        |
| 34      | -5.63            | Argillaceous limestone | 0.80                       | 0.09 | 1.59                       | 0.10 | 1.99                                        |
| 34      | -4.63            | Argillaceous limestone | 0.75                       | 0.05 | 1.43                       | 0.07 | 1.92                                        |
| 34      | -4.45            | Argillaceous limestone | 0.77                       | 0.05 | 1.48                       | 0.07 | 1.94                                        |
| Residue | -4.45            | Argillaceous limestone | 0.36                       | 0.04 | 0.73                       | 0.06 | 2.03                                        |
| 34      | -4.14            | Argillaceous limestone | 0.80                       | 0.05 | 1.56                       | 0.03 | 1.97                                        |
| 34      | -3.24            | Argillaceous limestone | 0.77                       | 0.06 | 1.52                       | 0.10 | 1.99                                        |
| 34      | -2.90            | Argillaceous limestone | 0.78                       | 0.05 | 1.56                       | 0.06 | 2.00                                        |
| 34      | -2.71            | Argillaceous limestone | 0.62                       | 0.05 | 1.27                       | 0.01 | 2.04                                        |
| 34      | -2.45            | Argillaceous limestone | 0.72                       | 0.05 | 1.51                       | 0.02 | 2.11                                        |
| 34      | -2.07            | Argillaceous limestone | 0.79                       | 0.05 | 1.55                       | 0.12 | 1.96                                        |
| 34      | -1.96            | Argillaceous limestone | 0.83                       | 0.08 | 1.62                       | 0.13 | 1.95                                        |
| 34      | -1.77            | Argillaceous limestone | 0.88                       | 0.05 | 1.77                       | 0.05 | 2.01                                        |
| 32      | -1.64            | Argillaceous limestone | 1.19                       | 0.05 | 2.29                       | 0.02 | 1.93                                        |
| 32      | -1.52            | Argillaceous limestone | 1.11                       | 0.05 | 2.16                       | 0.05 | 1.94                                        |
| Residue | -1.52            | Argillaceous limestone | 0.32                       | 0.04 | 0.63                       | 0.06 | 1.97                                        |
| 32      | -1.25            | Argillaceous limestone | 1.21                       | 0.05 | 2.63                       | 0.00 | 2.17                                        |
| 32      | -1.10            | Argillaceous limestone | 1.07                       | 0.05 | 2.07                       | 0.10 | 1.94                                        |
| 32      | -0.99            | Argillaceous limestone | 1.08                       | 0.05 | 2.10                       | 0.03 | 1.93                                        |
| 32      | -0.89            | Argillaceous limestone | 0.99                       | 0.08 | 1.93                       | 0.09 | 1.96                                        |
| 30      | -0.53            | Argillaceous limestone | 0.99                       | 0.05 | 1.91                       | 0.12 | 1.92                                        |
| 30      | -0.45            | Argillaceous limestone | 0.95                       | 0.05 | 1.91                       | 0.01 | 2.01                                        |
| 30      | -0.33            | Argillaceous limestone | 0.88                       | 0.05 | 1.80                       | 0.01 | 2.05                                        |
| 29      | -0.31            | Argillaceous limestone | 0.80                       | 0.05 | 1.54                       | 0.02 | 1.93                                        |
| 29      | -0.23            | Argillaceous limestone | 0.82                       | 0.06 | 1.59                       | 0.05 | 1.95                                        |
| 29      | -0.20            | Argillaceous limestone | 0.88                       | 0.05 | 1.75                       | 0.02 | 1.99                                        |
| 27      | -0.01            | Dolomitic limestone    | 0.74                       | 0.05 | 1.45                       | 0.01 | 1.95                                        |
| 26      | 0.12             | Argillaceous limestone | 0.84                       | 0.05 | 1.63                       | 0.00 | 1.95                                        |
| 24e     | 0.18             | Micritic limestone     | 0.30                       | 0.05 | 0.56                       | 0.03 | 1.89                                        |
| 24e     | 0.24             | Micritic limestone     | 0.57                       | 0.02 | 1.09                       | 0.08 | 1.98                                        |

|     |      |                    |      |      |      |      |      |
|-----|------|--------------------|------|------|------|------|------|
| 24e | 0.27 | Micritic limestone | 0.32 | 0.05 | 0.58 | 0.08 | 1.83 |
| 24e | 0.33 | Micritic limestone | 0.24 | 0.05 | 0.44 | 0.09 | 1.86 |
| 24e | 0.38 | Micritic limestone | 0.22 | 0.05 | 0.45 | 0.09 | 2.02 |
| 24d | 0.41 | Micritic limestone | 0.36 | 0.05 | 0.67 | 0.10 | 1.89 |
| 24d | 0.47 | Micritic limestone | 0.32 | 0.07 | 0.61 | 0.07 | 1.93 |
| 24d | 0.56 | Micritic limestone | 0.27 | 0.07 | 0.50 | 0.07 | 1.81 |
| 24d | 0.59 | Micritic limestone | 0.48 | 0.06 | 0.99 | 0.07 | 2.08 |
| 24c | 0.67 | Micritic limestone | 0.37 | 0.05 | 0.70 | 0.02 | 1.86 |
| 24c | 0.73 | Micritic limestone | 0.45 | 0.05 | 0.89 | 0.05 | 1.97 |
| 24c | 0.82 | Micritic limestone | 0.23 | 0.05 | 0.47 | 0.03 | 2.04 |
| 24b | 0.85 | Micritic limestone | 0.74 | 0.05 | 1.50 | 0.02 | 2.03 |
| 23  | 0.99 | Micritic limestone | 0.90 | 0.05 | 1.75 | 0.02 | 1.95 |
| 23  | 1.22 | Micritic limestone | 0.93 | 0.07 | 1.81 | 0.09 | 1.96 |
| 23  | 1.41 | Micritic limestone | 0.85 | 0.10 | 1.67 | 0.02 | 1.96 |
| 23  | 1.42 | Micritic limestone | 0.94 | 0.05 | 1.87 | 0.04 | 1.99 |
| 23  | 1.63 | Micritic limestone | 0.84 | 0.05 | 1.62 | 0.09 | 1.93 |
| 23  | 1.73 | Micritic limestone | 0.86 | 0.05 | 1.72 | 0.05 | 2.00 |
| 22  | 2.03 | Micritic limestone | 0.86 | 0.05 | 1.75 | 0.09 | 2.03 |
| 22  | 2.48 | Micritic limestone | 0.77 | 0.05 | 1.51 | 0.04 | 1.95 |
| 22  | 2.69 | Micritic limestone | 0.74 | 0.05 | 1.44 | 0.04 | 1.95 |
| 22  | 3.64 | Micritic limestone | 0.73 | 0.05 | 1.39 | 0.05 | 1.91 |
| 21  | 4.78 | Micritic limestone | 0.87 | 0.05 | 1.68 | 0.05 | 1.93 |
| 19  | 6.32 | Micritic limestone | 0.83 | 0.05 | 1.66 | 0.07 | 2.01 |
| 19  | 7.51 | Micritic limestone | 0.91 | 0.05 | 1.83 | 0.02 | 2.01 |

---



**Table DR3.** Zn isotopic compositions of international standards analyzed during the course of this study.

| Name   | Type   | Session | $\delta^{66}\text{Zn}$<br>(‰) | 2SD  | $\delta^{68}\text{Zn}$<br>(‰) | 2SD  | Reference                   |
|--------|--------|---------|-------------------------------|------|-------------------------------|------|-----------------------------|
| BHVO-2 | Basalt | 1       | 0.32                          | 0.04 | 0.65                          | 0.08 | <i>This study</i>           |
|        |        |         | 0.33                          | 0.04 | 0.65                          | 0.06 | <i>Chen et al. (2013)</i>   |
|        |        |         | 0.27                          | 0.06 | -                             | -    | <i>Sossi et al. (2015)</i>  |
| BIR-1a | Basalt | 1       | 0.25                          | 0.03 | 0.49                          | 0.05 | <i>This study</i>           |
|        |        | 2       | 0.29                          | 0.05 | 0.56                          | 0.02 | <i>This study</i>           |
|        |        | 3       | 0.29                          | 0.05 | 0.54                          | 0.07 | <i>This study</i>           |
|        |        | 4       | 0.28                          | 0.02 | 0.53                          | 0.02 | <i>This study</i>           |
|        |        | Average | 0.28                          | 0.04 | 0.53                          | 0.05 | <i>This study</i>           |
|        |        |         | 0.31                          | 0.04 | 0.61                          | 0.06 | <i>Chen et al. (2013)</i>   |
|        |        |         | 0.26                          | 0.09 | 0.54                          | 0.3  | <i>Herzog et al. (2009)</i> |

2SD = 2 times the standard deviation of the population of n repeat measurements of a sample solution. N: The times of repeat measurements of the same purification solution by MC-ICP-MS.

**Table DR4.** Zn and Sr concentrations of the carbonate fraction of samples from the Meishan section, South China.

| Depth to PTB<br>(m) | Zn( $\mu\text{g/g}$ ) | Sr( $\mu\text{g/g}$ ) | Depth to<br>PTB (m) | Zn( $\mu\text{g/g}$ ) | Sr( $\mu\text{g/g}$ ) |
|---------------------|-----------------------|-----------------------|---------------------|-----------------------|-----------------------|
| -12.03              | 17.5                  | 317.3                 | -0.45               | 19.3                  | 181.4                 |
| -9.78               | 49.7                  | 196.4                 | -0.33               | 18.9                  | 250.7                 |
| -8.29               | 46.0                  | 171.1                 | -0.23               | 13.5                  | 311.8                 |
| -7.13               | 41.2                  | 164.8                 | -0.20               | 8.7                   | 277.6                 |
| -5.63               | 37.3                  | 252.2                 | -0.01               | 6.6                   | 272.0                 |
| -4.79               | 27.6                  | 184.5                 | 0.12                | 17.3                  | 254.1                 |
| -4.63               | 35.7                  | 193.2                 | 0.18                | 50.2                  | 274.0                 |
| -4.45               | 28.6                  | 80.6                  | 0.24                | 30.1                  | 272.4                 |
| -4.14               | 39.1                  | 229.2                 | 0.27                | 49.3                  | 293.2                 |
| -3.82               | 37.7                  | 192.3                 | 0.33                | 26.8                  | 269.2                 |
| -3.66               | 36.1                  | 177.2                 | 0.38                | 106.5                 | 309.2                 |
| -3.47               | 35.2                  | 179.1                 | 0.47                | 117.1                 | 291.0                 |
| -3.24               | 32.1                  | 142.8                 | 0.59                | 17.8                  | 141.7                 |
| -2.90               | 32.3                  | 145.7                 | 0.73                | 5.0                   | 226.2                 |
| -2.71               | 22.6                  | 214.9                 | 0.93                | 0.2                   | 243.3                 |
| -2.45               | 30.5                  | 213.1                 | 1.22                | 0.3                   | 301.7                 |
| -2.07               | 28.0                  | 118.1                 | 1.33                | 0.3                   | 317.3                 |
| -1.96               | 28.6                  | 145.1                 | 1.63                | 7.8                   | 266.7                 |
| -1.77               | 27.8                  | 206.5                 | 1.73                | 0.3                   | 367.1                 |
| -1.64               | 32.4                  | 189.0                 | 2.03                | 1.1                   | 358.6                 |
| -1.52               | 28.0                  | 171.3                 | 2.48                | 0.1                   | 294.9                 |
| -1.25               | 20.3                  | 220.3                 | 2.69                | 3.1                   | 110.0                 |
| -1.10               | 33.5                  | 236.6                 | 3.64                | 0.2                   | 364.3                 |
| -0.99               | 25.5                  | 267.6                 | 4.78                | 0.1                   | 307.9                 |
| -0.89               | 35.8                  | 231.4                 | 6.32                | 1.8                   | 263.7                 |
| -0.53               | 17.5                  | 189.5                 | 7.51                | 0.9                   | 176.1                 |

**Table DR5.** Major elements (in wt.%) of bulk sediments from the Meishan section.

| Depth-to<br>PTB (m) | SiO <sub>2</sub> | TiO <sub>2</sub> | Al <sub>2</sub> O <sub>3</sub> | TFe <sub>2</sub> O <sub>3</sub> | MnO  | MgO  | CaO   | Na <sub>2</sub> O | K <sub>2</sub> O | P <sub>2</sub> O <sub>5</sub> | LOI   |
|---------------------|------------------|------------------|--------------------------------|---------------------------------|------|------|-------|-------------------|------------------|-------------------------------|-------|
| Meishan             |                  |                  |                                |                                 |      |      |       |                   |                  |                               |       |
| -12.031             | 25.01            | 0.34             | 6.69                           | 2.83                            | 0.13 | 3.75 | 29.67 | 0.07              | 1.82             | 0.06                          | 29.04 |
| -9.784              | 51.56            | 0.68             | 14.79                          | 5.19                            | 0.08 | 4.30 | 5.97  | 0.49              | 4.14             | 0.12                          | 11.73 |
| -8.287              | 53.96            | 0.74             | 14.79                          | 4.56                            | 0.06 | 3.98 | 5.12  | 0.42              | 4.12             | 0.10                          | 11.21 |
| -5.628              | 51.53            | 0.67             | 14.33                          | 4.72                            | 0.08 | 3.50 | 7.66  | 0.39              | 4.01             | 0.11                          | 12.68 |
| -4.634              | 53.93            | 0.69             | 14.58                          | 5.66                            | 0.05 | 3.48 | 5.10  | 0.41              | 4.07             | 0.08                          | 10.99 |
| -4.144              | 55.29            | 0.71             | 14.77                          | 6.07                            | 0.05 | 2.99 | 5.00  | 0.49              | 3.95             | 0.16                          | 10.47 |
| -3.655              | 52.82            | 0.71             | 14.27                          | 5.61                            | 0.07 | 4.23 | 6.69  | 0.52              | 3.52             | 0.08                          | 10.5  |
| -3.466              | 52.94            | 0.71             | 13.92                          | 5.31                            | 0.09 | 4.39 | 6.95  | 0.48              | 3.44             | 0.09                          | 10.86 |
| -2.713              | 37.28            | 0.42             | 9.05                           | 4.42                            | 0.18 | 7.74 | 15.16 | 0.31              | 2.39             | 0.08                          | 22.46 |
| -2.450              | 53.28            | 0.68             | 13.50                          | 5.88                            | 0.07 | 4.10 | 6.58  | 0.50              | 3.29             | 0.13                          | 11.01 |
| -2.073              | 52.26            | 0.65             | 13.71                          | 5.76                            | 0.07 | 4.05 | 6.12  | 0.44              | 3.70             | 0.11                          | 12.24 |
| -1.960              | 58.47            | 0.69             | 15.44                          | 4.28                            | 0.04 | 3.17 | 3.57  | 0.26              | 4.14             | 0.13                          | 9.66  |
| -1.772              | 58.11            | 0.70             | 14.74                          | 5.25                            | 0.04 | 3.00 | 3.81  | 0.23              | 3.94             | 0.11                          | 9.67  |
| -1.516              | 50.33            | 0.63             | 12.43                          | 4.85                            | 0.09 | 5.07 | 7.66  | 0.19              | 3.35             | 0.12                          | 14.33 |
| -1.095              | 54.31            | 0.72             | 13.58                          | 4.61                            | 0.08 | 4.65 | 6.33  | 0.10              | 3.80             | 0.09                          | 10.82 |
| Repeat              | 53.63            | 0.69             | 13.71                          | 4.61                            | 0.07 | 4.55 | 6.04  | 0.15              | 3.71             | 0.09                          | 12.93 |
| -0.885              | 58.43            | 0.74             | 15.58                          | 5.54                            | 0.03 | 3.00 | 2.97  | 0.19              | 4.11             | 0.08                          | 9.23  |
| -0.531              | 44.06            | 0.50             | 10.23                          | 3.90                            | 0.13 | 6.84 | 12.02 | 0.14              | 2.72             | 0.08                          | 19.28 |
| -0.333              | 44.42            | 0.57             | 10.61                          | 5.22                            | 0.08 | 6.80 | 10.93 | 0.13              | 2.72             | 0.09                          | 18.22 |
| -0.226              | 38.25            | 0.52             | 9.09                           | 4.32                            | 0.08 | 6.76 | 15.89 | 0.22              | 2.13             | 0.11                          | 21.72 |
| -0.199              | 33.47            | 0.29             | 6.13                           | 2.33                            | 0.07 | 7.97 | 20.99 | 0.25              | 1.66             | 0.06                          | 26.43 |
| -0.019              | 27.48            | 0.20             | 4.06                           | 2.10                            | 0.09 | 5.01 | 30.58 | 0.07              | 0.98             | 0.01                          | 28.80 |
| 0.116               | 45.51            | 0.52             | 10.12                          | 3.26                            | 0.06 | 4.77 | 13.83 | 0.13              | 2.48             | 0.07                          | 18.27 |
| 0.239               | 14.22            | 0.05             | 1.45                           | 0.94                            | 0.10 | 0.78 | 45.33 | 0.07              | 0.47             | 0.18                          | 35.83 |
| 0.384               | 12.88            | 0.03             | 0.88                           | 0.39                            | 0.05 | 0.72 | 47.04 | 0.07              | 0.22             | 0.89                          | 36.05 |
| 0.586               | 35.62            | 0.10             | 3.01                           | 1.20                            | 0.04 | 0.91 | 30.02 | 0.12              | 0.64             | 0.05                          | 27.51 |
| 0.730               | 7.98             | 0.03             | 0.90                           | 0.45                            | 0.02 | 0.99 | 48.95 | 0.10              | 0.19             | 0.07                          | 39.22 |
| 1.217               | 7.08             | 0.03             | 0.97                           | 0.37                            | 0.01 | 0.75 | 49.68 | 0.03              | 0.25             | 0.10                          | 39.92 |
| 1.633               | 15.71            | 0.10             | 2.74                           | 1.03                            | 0.01 | 0.75 | 43.20 | 0.09              | 0.79             | 1.51                          | 33.48 |
| 2.482               | 31.89            | 0.09             | 2.85                           | 0.78                            | 0.01 | 1.55 | 32.89 | 0.04              | 0.61             | 0.47                          | 27.77 |
| 3.641               | 1.19             | 0.00             | 0.20                           | 0.04                            | 0.01 | 0.66 | 54.31 | 0.02              | 0.05             | 0.16                          | 42.71 |
| 4.782               | 5.44             | 0.00             | 0.19                           | 0.15                            | 0.01 | 0.66 | 51.23 | <0.03             | <0.03            | 0.18                          | 41.6  |

## References

- Burgess, S.D., Bowring, S., and Shen, S.Z., 2014, High-precision timeline for Earth's most severe extinction: *Proceedings of the National Academy of Sciences of the United States of America*, v. 111, P. 3316-3321, doi: 0.1073/pnas.1403228111.
- Cao, C.Q., Love, G.D., Hays, L.E., Wang, W., Shen, S.Z., and Summons, R.E., 2009, Biogeochemical evidence for euxinic oceans and ecological disturbance presaging the end-Permian mass extinction event: *Earth and Planetary Science Letters*, v. 281, p. 188-201, doi:10.1016/j.epsl.2009.02.012.
- Chen, H., Savage, P.S., Teng, F.-Z., Helz, R.T., and Moynier, F., 2013, Zinc isotope fractionation during magmatic differentiation and the isotopic composition of the bulk Earth: *Earth and Planetary Science Letters*, v. 369–370, p. 34–42, doi: 10.1016/j.epsl.2013.02.037.
- Grice, K., Cao, C.Q., Love, G.D., Bottcher, M.E., Twitchett, R.J., Grosjean, E., Summons, R.E., Turgeon, S.C., Dunning, W., and Jin, Y.G., 2005, Photic Zone Euxinia During the Permian-Triassic Superanoxic Event: *Science*, v. 307, p. 706–709, doi:10.1126/science.1104323.
- Herzog, G.F., Moynier, F., Albarede, F., and Berezhnoy, A.A., 2009, Isotopic and elemental abundances of copper and zinc in lunar samples, Zagami, Pele's hairs, and a terrestrial basalt: *Geochimica et Cosmochimica Acta*, v. 73, p. 5884–5904, doi: 10.1016/j.gca.2009.05.067.
- Jiang, H.S., Lai, X., Luo, G., Aldridge, R., Zhang, K., and Wignall, P.B., 2007, Restudy of conodont zonation and evolution across the P/T boundary at Meishan section, Changxing, Zhejiang, China: *Global Planetary Change*, v. 55, p. 39–55, doi:10.1016/j.gloplacha.2006.06.007.
- Jin, Y.G., Shen, S.Z., Henderson, C.M., Wang, X.D., Wang, W., Wang, Y., Cao, C.Q., and Shang, Q.H., 2006, The Global Stratotype Section and Point (GSSP) for the

boundary between the Capitanian and Wuchiapingian stage (Permian): Episodes, V. 29, no. 4, p. 253-262.

- Kunzmann, M., Halverson, G.P., Sossi, P.A., Raub, T.D., Payne J.L., and Kirby, J., 2013, Zn isotope evidence for immediate resumption of primary productivity after snowball Earth: *Geology*, v. 41, p. 27-30, doi:10.1130/G33422.1.
- Liu, S.-A., Li, S.G., He, Y.S., and Huang, F., 2010, Geochemical contrasts between early Cretaceous ore-bearing and ore-barren high-Mg adakites in central-eastern China: implications for petrogenesis and Cu–Au mineralization: *Geochimica et CosmochimicaActa*, v. 74, p. 7160–7178, doi:10.1016/j.gca.2010.09.003.
- Liu, S.-A., Li, D., Li, S., Teng, F.-Z., Ke, S., He, Y., and Lu, Y., 2014, High-precision copper and iron isotope analysis of igneous rock standards by MC-ICP-MS. *Journal Analytical Atomic Spectrometry*, v. 29, p. 122–133, doi:10.1039/c3ja50232e.
- Little, S.H., Vance, D., Walker-Brown, C., and Landing, W.M., 2014, The oceanic mass balance of copper and zinc isotopes, investigated by analysis of their inputs, and outputs to ferromanganese oxide sediments: *Geochimica et CosmochimicaActa*, v. 125, p. 673-693, doi: 10.1016/j.gca.2013.07.046.
- Lv, Y.W., Liu, S.A., Zhu, J.M., and Li, S.G., 2016, Copper and zinc isotope fractionation during deposition and weathering of highly metalliferous black shales in central China: *Chemical Geology*, v. 422, p. 82-93, doi:10.1016/j.chemgeo.2015. 12.017.
- Maréchal, C.N., Telouk, P., and Albarède, F., 1999, Precise analysis of copper and zinc isotopic compositions by plasma-source mass spectrometry: *Chemical Geology*, v. 156, p. 251–273, doi:10.1016/S0009-2541(98)00191-0.
- Moeller, K., Schoenberg, R., Pedersen, R.-B., Weiss, D., and Dong, S., 2012, Calibration of the new certified reference materials ERM-AE633 and ERM-AE647 for copper and IRMM-3702 for zinc isotope amount ratio determinations: *GeostandardsGeoanalytical Research*, v. 36, p. 177–199,

doi:10.1111/j.1751-908X.2011.00153.x.

Nabbefeld, B., Grice, K., Schimmelmann, A., Sauer, P.E., Böttcher, M.E., and Twitchett,

R., 2010, Significance of  $\delta D_{\text{kerogen}}$ ,  $\delta^{13}C_{\text{kerogen}}$  and  $\delta^{34}S_{\text{pyrite}}$  from several

Permian/Triassic (P/Tr) sections: *Earth and Planetary Science Letters*, v. 295, p.

21–29, doi:10.1016/j.epsl.2010.03.015.

Pichat, S., Douchet, C., and Albarède, F., 2003, Zinc isotope variations in deep-sea carbonates from the eastern equatorial Pacific over the last 175 ka: *Earth and Planetary Science Letters*, v. 210, p. 167–178, doi:10.1016/S0012-821X(03)00106-7.

Shen, S.Z., and 21 others, 2011, Calibrating the End-Permian Mass Extinction: *Science*, v. 334, p. 1367–1372, doi:10.1126/science.1213454.

Sossi, P.A., Halverson, G.P., Nebel, O., and Eggins, S.M., 2015, Combined separation of Cu, Fe and Zn from rock matrices and improved analytical protocols for stable isotope determination: *Geostandards Geoanalytical Research*, v. 39, p. 129–149, doi:10.1111/j.1751-908X.2014.00298.x.

Vance, D., Little, S.H., Archer, C., Cameron, V., Andersen, M.B., Rijkenberg, M.J.A., and Lyons, T.W., 2016, The oceanic budgets of nickel and zinc isotopes: the importance of sulfidic environments as illustrated by the Black Sea. *Phil. Trans. R. Soc. A* 374: 20150294, doi: org/10.1098/rsta.2015.0294.

Wu, H.C., Zhang, S.H., Hinnov, L.A., Jiang, G.Q., Feng, Q.L., Li, H.Y., and Yang, T.S., 2013, Time-calibrated Milankovitch cycles for the late Permian: *Nature Communications*, v. 4, no. 2452, doi: 10.1038/ncomms3452.

Yin, H., Zhang, K., Tong, J., Yang, Z., and Wu, S., 2001, The global Stratotype section and point (GSSP) of the Permian-Triassic boundary: *Episodes*, v. 24, no. 2, p. 102–114.

- Yuan, D.X., Shen, S. Z., Henderson, C.M., Chen, J., Zhang, H., and Feng, H. Z., 2014, Revised conodont-based integrated high-resolution timescale for the Changhsingian Stage and end-Permian extinction interval at the Meishan sections, South China: *Lithos*, v. 204, p. 220-245, doi:10.1016/j.lithos.2014.03.026.
- Zhang, K.X., Lai, X.L., Tong, J. N., and Jiang, H. S., 2009, Progresses on study of conodont sequence for the GSSP section at Meishan, Changxing, Zhejiang province, South China: *ActaPalaeontol. Sin.*, v. 48, p. 474–486. In Chinese with English abstract.
- Ziegler, A.M., Hulver, M.L., and Rowley, D.B., 1997, Permian world topography and climate, *in* Martini, I.P., ed., Late glacial and postglacial environmental changes--Quaternary, Carboniferous-Permian and Proterozoic: New York, Oxford University Press, p. 111-146.
